# Supplementary material
Source: PubMed Central journal article supplement (PMC3207435)
Supplement: supp_M111.290130_jbc.M111.290130-1.pdf [file supp_M111.290130_jbc.M111.290130-1.pdf]

```

HSP90.1 -----MADVQMDAETFAFQAEINQLLSLIINTFYSNKEIFLRELISNSSDALKIR
HSP90.2 -----MADAETFAFQAEINQLLSLIINTFYSNKEIFLRELISNSSDALKIR
human  MPEETQTQDQPMEEEEVETFAFQAEIAQLMSLIINTFYSNKEIFLRELISNSSDALKIR

HSP90.1 FESLTDKSKLDGQPELFIIRLVDPKSNKTLSTIDSGIGMTKADLVNNLGTIARSGTKEFME
HSP90.2 FESLTDKSKLDGQPELFIIRLVDPKSNKTLSTIDSGIGMTKADLVNNLGTIARSGTKEFME
human  YESLTDPSKLDGSKELHINLIPNKQDRTLTIIVDTGIGMTKADLVNNLGTIARSGTKAFME

HSP90.1 ALQAGADVSMIGQFGVGFYSAYLVAEKVVVTTKHNDDEQYVWESQAGGSFTVTRDVGEP
HSP90.2 ALAAGADVSMIGQFGVGFYSAYLVAEKVVVTTKHNDDEQYVWESQAGGSFTVTRDTSGET
human  ALQAGADVSMIGQFGVGFYSAYLVAEKVVVTTKHNDDEQYVWESSAGGSFTVTRDTSGET-GEF

HSP90.1 LGRGTRITLFLKDDQLEYLEERRLKDVLKHHSEFISYPIYLWTEKTEKEISDDEDEDEEP
HSP90.2 LGRGTRKMLYLKEDQLEYLEERRLKDVLKHHSEFISYPISLWTEKTEKEISDDEDEDEEE-
human  MGRGTRKVIHLKEDQLEYLEERRLKEIVKHHSEFISYPIITLFWVEKERDKEVSDDEAEEKE

HSP90.1 KKEEKEGEVEEVD-----EEKEK---DGKKKKKIKEVSHEWELLNKQKPIWLR
HSP90.2 KKDEEGKVEEVD-----EEKEK---EKKKKKIKEVSHEWDLVKNQKPIWMR
human  DKEEKEKEEKESEDKPEIEDVGSDEEKEKDKDKKKKKKIKEKYIDQBELNKTKPIWTR

HSP90.1 KPEEITKEEYAAFYKSLTNDWEDHLAVKHFVSEGLEFKAILFVPPKRAPFDLFDTRKKLN
HSP90.2 KPEEITKEEYAAFYKSLTNDWEDHLAVKHFVSEGLEFKAILFVPPKRAPFDLFDTRKKLN
human  NPDDITNEEYGEFYKSLTNDWEDHLAVKHFVSEGLEFKAILFVPPKRAPFDLFDTRKKLN

HSP90.1 NIKLYVRRVFIMDNCIELIPEYLSFVKGVVSDDDLPLNISRETLOQNKILKVIKKNLVKK
HSP90.2 NIKLYVRRVFIMDNCEDIPEYLSFVKGVVSDDDLPLNISRETLOQNKILKVIKKNLVKK
human  NIKLYVRRVFIMDNCIELIPEYLSFVKGVVSDDDLPLNISRETLOQNKILKVIKKNLVKK

HSP90.1 CIEFNFIEIAENKEDYTKFYEAFSKNLKLGIHEDSQNRGKIADLLRYHSTKSGDEMTSFKD
HSP90.2 CLELFFIEIAENKEDYTKFYEAFSKNLKLGIHEDSQNRGKIADLLRYHSTKSGDEMTSLK
human  CLELFFIEIAENKEDYTKFYEAFSKNLKLGIHEDSQNRGKIADLLRYHSTKSGDEMTSLK

HSP90.1 YVTRMKEGQKIDIFYITGESKKAVENSPFLERLKKRGYEVLYMVDAIDEYAVGQLKEYDYGK
HSP90.2 YVTRMKEGQKIDIFYITGESKKAVENSPFLERLKKRGYEVLYMVDAIDEYAVGQLKEYDYGK
human  YCTRMEKQKIDIFYITGESKKAVENSPFLERLKKRGYEVLYMVDAIDEYAVGQLKEYDYGK

HSP90.1 KLVSAATKEGLKLD-ETDEEKKKREKKSFKENLCKTIKEILGDKVKEKVVVSDRIVDSPCC
HSP90.2 KLVSAATKEGLKLD-ETDEEKKKREKKSFKENLCKTIKEILGDKVKEKVVVSDRIVDSPCC
human  TLVSVTKEGLELP-EDDEEKKKREKKSFKENLCKTIKEILGDKVKEKVVVSDRIVDSPCC

HSP90.1 LVTGEYGWTANMERIMKAQALRDSSMSGYMSKKTMEINPDNGIMEELRKRABADKNDKS
HSP90.2 LVTGEYGWTANMERIMKAQALRDSSMSGYMSKKTMEINPDNSIMDELKRABADKNDKS
human  LVTSTYGTANMERIMKAQALRDNSMTGYMAAKKHEINPDHSITETLRQKABADKNDKS

HSP90.1 VKDLVMLLYETALLTSGFSLDEPNTFAARIHRMLKLGSLIDEDENVEEDG-----DMPE
HSP90.2 VKDLVMLLYETALLTSGFSLDEPNTFCSRIHRMLKLGSLIDEDDVAEADA-----EMPP
human  VKDLVMLLYETALLTSGFSLDEPNTFANRIHRMLKLGSLIDEDDPTADDTSAAVTEEMPP

HSP90.1 LEEDAEE-SK MEEVD
HSP90.2 LEDDAEEGSK MEEVD
human  LEGDDTS--T MEEVD

```

**Supplemental Figure 1:** Amino acid sequence alignment of cytoplasmic Hsp90 proteins from *Arabidopsis* (HSP90.1, HSP90.2) and human Hsp90. The peptide used in CyP40 interaction experiments is underlined in red. The MEEVD sequenced is boxed in green.
