# Supplementary material
Source: PubMed Central journal article supplement (PMC3207435)
Supplement: supp_M111.290130_jbc.M111.290130-2.pdf [file supp_M111.290130_jbc.M111.290130-2.pdf]

```

HSP90.1 -----
HSP90.7 ---MRKRTLVSVLFVFLSLLFLLPDAQGRKLDHAN-----AEESSDDVTDPPK
HSP90.5 MAPALSRSLYTSPLTSVPIPTVSSRLSHLRSS-----FLPHGALRRTG
HSP90.6 MIRLSKRSLVSTLLRSGNQSERIAAAASTSRSSPSATDVKRSDESRWYSSLTNGQSKNSG

HSP90.1 -----MADVQMADETFAFQAEINQLLSLIINTFYSNKEI
HSP90.7 VEEKIGGGHGLSTDSDVHRESESMKKTLRNSAEKFEFOAEVSRLMDIINSLYSNKDI
HSP90.5 VSCSNLEKRCNR-FAVKCDAAVAEKETTEEGSGEKFEYQAEVSRLDLIVHSLYSHKEV
HSP90.6 SFAQLNMKTNWFMGYRNESAAASDSSSQAPPAEKFEYQAEVSRLMDLIVNSLYSNKEV

HSP90.1 FLRELISNSD DALDKIRFESLTDKSKLD--GQPELFLRLVDPKSNKTLSTIDSGIGMTKA
HSP90.7 FLRELISNASDALDKIRFALTDKDVLCGGDTAKLEIQIKLDAKKILSIRDRGIGMTKE
HSP90.5 FLRELVSNASDALDKLRFLSVTEPSLLG--DGGDLERIKKPDNDGTITITDRGIGMTKE
HSP90.6 FLRELISNASDALDKLRFLSVTNPELSK--DAPDLDIRIYADKENGITITLTDSGIGMTRQ

HSP90.1 DLVNNLGTIARSGTKEFMBALQ---ACADVSMIGQFGVGFYSALVAEKVVVTTKHN-D
HSP90.7 DLTKNLGTIARSGTSAFVEKMQ---SSGDLNLIGQFGVGFYSALVADYIEVLSKHN-D
HSP90.5 ELIDCLGTIAQSGTSKFLKALKENKDLGADNGLIGQFGVGFYSALVAEKVVVSTKSPKS
HSP90.6 ELVDCLGTIAQSGTAKFMKALKDSK DAGGDNNLIGQFGVGFYSALVADRVVSTKSPKS

HSP90.1 DEQYVWESQAGG-SFTVTRVDV DGE-PLGRGTKITLFLKDDQL-EYLEERRLKDLVKKHSE
HSP90.7 DSQYVWESKANG-KFAVSEDTWNE-PLGRGTEIRLHLRDEAG-EYLEESKLELVKRYSE
HSP90.5 DKQYVWESVADSSSYLIREETDPPNLRRGTOITLVLREDDKVEFAESTRIKLVKNYSQ
HSP90.6 DKQYVWEGEANS SSFTIQEDTDPOSLFRGTRITLHLKQAEK-NFADPERIQKLVKNYSQ

HSP90.1 FTSYPIYLWTEKTTKEKISDDEDE--DEPKKENEGEVEVEDEKKEKDGKKK--KKIKEV
HSP90.7 FLNFPISLWASKEVETEVEVEEDESADDETETTSTEEKEEDAEEEDGKKQTKKKVKET
HSP90.5 FVGFPIYTWQEK--SRTIEVEED-----EPVKEGEEGEPKKKTKTK--TEK
HSP90.6 FVSFPIYTWQEKGYTKEVEVEDDP-----TETKKDDQDDQTEKKKKTKKVVER

HSP90.1 SHEWELINKQKPIWLRKPEEITKEEYAAFYKSLTNDWEDH--LAVKHFSVGEQLEFKAIL
HSP90.7 VYEWELLNDVKAIWLRSPKEVTEEEYTKFYHSLSKDFTEKPMWASHFNAGEGVFKAVL
HSP90.5 YWDWELANETKPIWLRNSKEVEKGEYNEFYKKAFFNEFLDP--LAHTHFTTEGEVEFRSIL
HSP90.6 YWDWELTNETQPIWLRNPKEVTTAEYNEE RKAFFNEFLDP--LASSHFTTEGEVEFRSIL

HSP90.1 FVPKRAPFDLFDTRKKLN--NIKLYVRRVFI MDNCE-ELIPEYLSFVKGVVSDDDLPLNI
HSP90.7 YVPPKAPHDLYESYVNSNKAANKLKYVRRVFISDEFD-ELLPKYLSFLKGLVDSDDLPLNV
HSP90.5 YLPGMGPLNNEVDNPKTK-NIRLYVRRVFISDDFDGELFPRYLSFVKGVVSDDDLPLNV
HSP90.6 YVPPVSPSGKDDIVNQKTK-NIRLYVRRVFISDDFDGELFPRYLSFVKGVVSDDDLPLNV

HSP90.1 SRETLQONKILKVIKRNLVKKEIEMFNETAENKED-----YTK
HSP90.7 SREMLQOHSLSKTIKKKLRKALDMLRKLAEEDPDEIHDDEKDVKEKSGENDEKKGQYTK
HSP90.5 SREILQESRIVRIMRKRLRKTDFDMIQETISESENKE-----DYKK
HSP90.6 SREILQESRIVRIMRKRLVRKAFDMI LCTLSLENRE-----DYEK

HSP90.1 FVEAFSKNLKLG IHEDSONRGKIADLLRYHSTKSGDEMTSFKDYVTRMKEGQRDIFYITG
HSP90.7 FWNDFGKSVKLGITIEDAANRNRLAKLLRFETTKSDGKLTSLDQYTKRMKKSQKDIIFYITG
HSP90.5 FWNDFGRFLKLGCIEDTGNHKRITPLLRFFSSKNEBELTSLDDYIENMNGOKAIYIYLAT
HSP90.6 FWDNDFGKHLKLGCIEDRENHKRIAPLLRFFSSQSENDMISLDEYVENMKPEQKAIYFIAS

HSP90.1 ESKKAVENS PFLERLKRGYEVLYMVDALDEYAVGOLKEYDGGKLV SATKEGLKLEDETE
HSP90.7 SKKEQLEKSPFLERLIKRGYEVLIFFTDPVDEYLMQVLMYEDKKFQNVSKEGLVGKDS-
HSP90.5 DSLKSAKSA PFLEKLIQKDI EVLYLVEPIDEVALQNLQTYKEKFFVDISKEDLELGDDE
HSP90.6 DSITSAKNA PFLEKMLEKGL EVLYLVEPIDEVAVQSLKAYKEKDFVDISKEDLDLGDKNE

HSP90.1 EKKKREKKSSEFNLCITKEILG-DKVEKVVVSDRIVDSPCCLVTGEYGWANMERIM
HSP90.7 ---KDKELEKFAFKELTKWKG NLA SENVDDVKISNRLADTPCVVVT SKFGWSANMERIM
HSP90.5 V---KDREAKQEFNLLCDWIKQQLG-DKVAKVQVSNRLLSSSPCVLVS GKFGWSANMERIM
HSP90.6 E---KEAAVKKEFGQTCDWIKKRLG-DKVASVQISNRLSSSPCVLVS GKFGWSANMERIM

HSP90.1 KAQALRDSMSMGYMSSKKTMEINPDNGIMEELRKRRAEADKNDKSVKDLVMLLYETALLTS
HSP90.7 QSOTLSDANKQAYMRGKRVLEINPRHPIIKELKDRIASDPEDSVKETAQLMYQTALIES
HSP90.5 KAQALGDTSSLEFMRGRRLLEINPDHPIIKDLNAACKNAPPESTEATRVVDLTYDTALISS
HSP90.6 KAQSTGDTTSLDYMKGRRVFEINPDHSIIKNINAAYNSNPNDDEDAMRAIDLMYDALVSS

HSP90.1 GFLSDEPNTFAARIHRMLKLGLS--IDEDENVEEDGDMPE-ELEEDAEEESKMEEVV----
HSP90.7 GFLITDPKDFARIYNSVKSGLN--ISPDVADEEIEAAEPEPETSEATETKSLDLGAGLN
HSP90.5 GFTPDSPAELGNKIYEMMAMAVGGRWRVVEE-EESSTVNEGDDKSGETEVEVPESE----
HSP90.6 GFTPDNPAELGGKIYEMMDVALSGKWSPEVQPPQQQMAHSHDAETFEAEVEVPEVE----

```

Supplemental Figure 2: Amino acid sequence alignment of *Arabidopsis* cytoplasmic (HSP90.1) and organellar (HSP90.5, HSP90.6, HSP90.7) Hsp90 proteins. The peptide used in CyP40 interaction experiments is underlined in red.
