# Supplementary material
Source: PubMed Central journal article supplement (PMC3207435)
Supplement: supp_M111.290130_jbc.M111.290130-3.pdf [file supp_M111.290130_jbc.M111.290130-3.pdf]

**Supplemental Table 1: Primers used for HSP90 constructs**

| Construct            | Forward Primers                              | Reverse Primers                     |
|----------------------|----------------------------------------------|-------------------------------------|
| HSP90.1              | 5' - CACCATGGCGGATGTTTCAGATGGC - 3'          | 5' - TTAGTCGACTTCCTCCATCTTG - 3'    |
| HSP90.1 (503-705aa)  | 5' - CACCATGGACGAATACGCTGTTGGAC - 3'         | 5' - TTAGTCGACTTCCTCCATCTTG - 3'    |
| HSP90.1 (503-700aa)  | 5' - CACCATGGACGAATACGCTGTTGGAC - 3'         | 5' - TTACTTGCTCTCTTCAGCAGCGTCC - 3' |
| HSP90.2              | 5' - CACCATGGCGGACGCTGAAACCTTTGC - 3'        | 5' - TTAGTCGACTTCCTCCATCTTG - 3'    |
| HSP90.2 (497-699aa)  | 5' - CACCATGGATGAGTACGCTATTGGTCAGC - 3'      | 5' - TTAGTCGACTTCCTCCATCTTG - 3'    |
| HSP90.2 (497-694aa)  | 5' - CACCATGGATGAGTACGCTATTGGTCAGC - 3'      | 5' - TTACTTGCTACCTTCGGCATCAGC - 3'  |
| HSP90.5 (569-780 aa) | 5' - CACCGATGAAGTTGCTATTCAGAATTTGCAAACC - 3' | 5' - TCAATCTTGCCAAGGATCACTC - 3'    |
| HSP90.6 (592-799aa)  | 5' - CACCGATGAAGTTGCCGTACAGAGTTTAAAAGC - 3'  | 5' - TCATTTCTTCCCATCCACTTCGAC - 3'  |
| HSP90.7 (603-823aa)  | 5' - CACCGATGAATACTTGATGCAATACCTGATG - 3'    | 5' - CTACAGTTCGTCTTGGTGTCTC - 3'    |

**Supplemental Table 2: Primers used for using site-directed ligase-independent mutagenesis**

|               |                                                       |
|---------------|-------------------------------------------------------|
| PPIase siteR  | 5' - AAATCGATTCCCCTTGTAATGGAGAGG - 3'                 |
| PPIase ALL F  | 5' - AGCCCCCTTGATAACAGCAGCAAATCGATTCCCCTTG - 3'       |
| PPIase ALL F  | 5' - GCTGCTGTTATCAAGGGGGCTATGATACAAGGTGGG - 3'        |
| PPIase site F | 5' - ATGATACAAGGTGGGGATATATCAGC - 3'                  |
| TPR site F    | 5' - CAAGGCCAGGCATACATGGCTC - 3'                      |
| TPR site R    | 5' - TTCATCACGCATAGCAAATTCAG - 3'                     |
| TPR ASP F     | 5' - GCTAACAATGTTAAAGCATTGTTTCGACAAGGCCAGGCATAC - 3'  |
| TPR ASP R     | 5' - TCGAAACAATGCTTTAACATTGTTAGCTTCATCACGCATAGC - 3'  |
| TPR LYS F     | 5' - GATAACAATGTTGCTGTCATTGTTTCGACAAGGCCAGGCATAC - 3' |
| TPR LYS R     | 5' - TCGAAACAATGCAGCAACATTGTTATCTTCATCACGCATAGC - 3'  |
| TPR ARG F     | 5' - GATAACAATGTTAAAGCATTGTTTGCTCAAGGCCAGGCATAC - 3'  |
| TPR ARG R     | 5' - AGCAAACAATGCTTTAACATTGTTATCTTCATCACGCATAGC - 3'  |
| TPR ALL F     | 5' - GCTAACAATGTTGCTGTCATTGTTTGCTCAAGGCCAGGCATAC - 3' |
| TPR ALL R     | 5' - AGCAAACAATGCAGCAACATTGTTAGCTTCATCACGCATAGC - 3'  |
